# Supplementary material for: Detection of interferon alpha protein reveals differential levels and cellular sources in disease
Source: PubMed Central journal article supplement — J Exp Med. 2017 May 1;214(5):1547–55. doi: 10.1084/jem.20161451 (PMC5413335; doi:10.1084/jem.20161451), 2017-05-01
Supplement: JEM_20161451_sm.pdf [file JEM_20161451_sm.pdf]

SUPPLEMENTAL MATERIAL

Rodero et al., <https://doi.org/10.1084/jem.20161451>

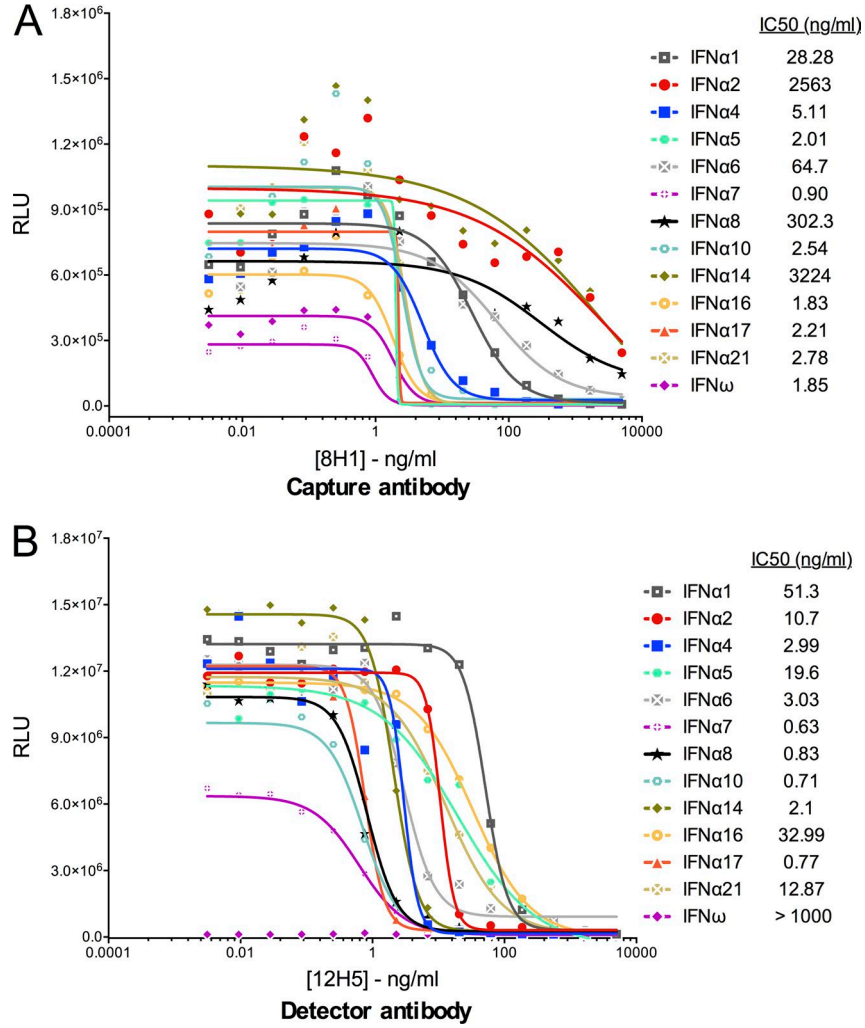

Figure S1. **IC50 values of mAbs used in Simoa assay for all IFNα subtype.** 10,000 HEK 293 MSR cells were seeded in white half-area 96-well plates (Corning) and reverse-transfected with 50 ng premixed ISRE-Firefly luciferase reporter and Renilla luciferase constructs (QIAGEN) using FuGENE HD according to the manufacturer's instructions (Promega). The Renilla luciferase-expressing construct served as an internal normalization control. Cells were incubated overnight in Opti-MEM I Reduced Serum Medium supplemented with 0.1 mM nonessential amino acids, 1 mM sodium pyruvate, 0.5% fetal bovine serum (Thermo Fisher Scientific) at 37°C, 5% CO<sub>2</sub> in a humidified atmosphere. After overnight incubation, cells were stimulated for 24 h with medium containing mixtures of recombinant human IFNα with or without anti-IFNα mAbs (A: 8H1 Ab, B: 12H5 Ab) or control IgG that had been preincubated for 1 h at 37°C. After 24 h of stimulation, dual luciferase reporter assays were performed according to the manufacturer's instructions (Promega). RLU, relative luciferase units.

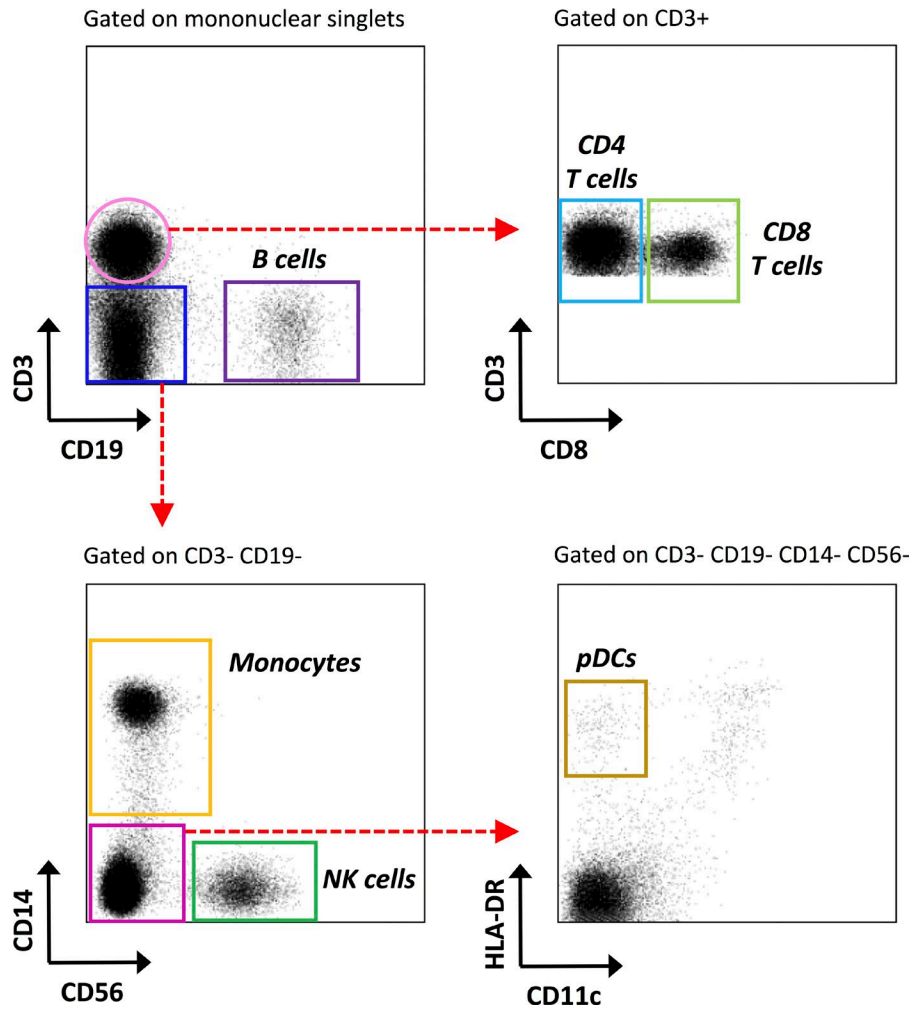

Figure S2. **Flow cytometry gating strategy.** Flow cytometry gating strategy for the isolation of CD8<sup>+</sup> and CD4<sup>+</sup> T cells, B cells, NK cells, monocytes, and pDCs.

Table S1. Retinal vasculopathy with cerebral leukodystrophy

| Patient  | Sex | Age at sampling<br><i>yr</i> | Gene  | ISG score | IFN activity | IFN $\alpha$ serum<br><i>fg/ml</i> | IFN $\alpha$ CSF<br><i>fg/ml</i> |
|----------|-----|------------------------------|-------|-----------|--------------|------------------------------------|----------------------------------|
| RVCLM001 | M   | 54                           | TREX1 | ND        | <2           | 0.69                               | ND                               |
| RVCLM003 | M   | 23                           | TREX1 | ND        | <2           | 1.81                               | 0.69                             |
| RVCLM004 | F   | 62                           | TREX1 | 1.4       | <2           | 24.31                              | ND                               |
| RVCLM005 | F   | 52                           | TREX1 | ND        | <2           | 1.12                               | 0.69                             |
| RVCLM006 | F   | 61                           | TREX1 | ND        | <2           | 1.10                               | ND                               |
| RVCLM007 | F   | 51                           | TREX1 | ND        | <2           | 0.96                               | ND                               |
| RVCLM008 | F   | 53                           | TREX1 | ND        | <2           | 3.60                               | 0.69                             |
| RVCLM010 | M   | 57                           | TREX1 | ND        | <2           | 3.49                               | ND                               |
| RVCLM011 | F   | 22                           | TREX1 | ND        | <2           | 1.49                               | 2.40                             |
| RVCLM012 | M   | 59                           | TREX1 | 2.1       | <2           | 1.21                               | ND                               |
| RVCLM013 | F   | 44                           | TREX1 | ND        | <2           | 0.92                               | 0.69                             |
| RVCLM014 | F   | 19                           | TREX1 | ND        | <2           | 2.36                               | ND                               |
| RVCLM015 | M   | 53                           | TREX1 | ND        | <2           | 2.09                               | 0.69                             |
| RVCLM016 | F   | 52                           | TREX1 | ND        | <2           | 1.92                               | 0.69                             |
| RVCLM017 | F   | 23                           | TREX1 | ND        | <2           | 10.82                              | ND                               |
| RVCLM018 | M   | 25                           | TREX1 | ND        | <2           | 0.69                               | ND                               |
| RVCLM020 | F   | 21                           | TREX1 | ND        | <2           | 0.69                               | ND                               |
| RVCLM021 | F   | 57                           | TREX1 | ND        | <2           | 1.39                               | ND                               |
| RVCLM023 | F   | 31                           | TREX1 | ND        | <2           | 1.32                               | 0.69                             |
| RVCLM025 | F   | 62                           | TREX1 | ND        | <2           | 17.26                              | 55.72                            |
| RVCLM026 | M   | 36                           | TREX1 | ND        | <2           | 0.69                               | ND                               |
| RVCLM027 | F   | 61                           | TREX1 | ND        | <2           | 0.69                               | ND                               |
| RVCLM029 | F   | 44                           | TREX1 | ND        | <2           | 0.93                               | 0.69                             |
| RVCLM034 | M   | 42                           | TREX1 | ND        | <2           | 1.76                               | 0.69                             |
| RVCLM036 | M   | 55                           | TREX1 | ND        | <2           | 7.65                               | ND                               |
| RVCLM043 | F   | 64                           | TREX1 | ND        | <2           | 1.18                               | ND                               |
| RVCLM052 | M   | 38                           | TREX1 | ND        | <2           | 1.72                               | 17.95                            |
| RVCLM055 | F   | 55                           | TREX1 | ND        | <2           | 11.75                              | ND                               |
| RVCLM062 | M   | 24                           | TREX1 | ND        | <2           | 28.84                              | ND                               |

F, female; M, male; ND, not determined.

Table S2. JDM

| Patient | Sex | Age at sampling | ISG score | IFN activity | IFN $\alpha$ | Treatment                           |
|---------|-----|-----------------|-----------|--------------|--------------|-------------------------------------|
|         |     | <i>yr</i>       |           |              | <i>fg/ml</i> |                                     |
| F745    | M   | 7               | 8.1       | ND           | 48.5         | HCO, MMF, steroids                  |
| F857    | M   | 5               | 25.9      | 12           | 196.9        | Immunoadsorption ivaquine, steroids |
| F859    | F   | 7               | ND        | ND           | 160.8        | Bolus MP, steroids                  |
| F875    | F   | 19              | ND        | ND           | 8.9          | Steroids                            |
| F900    | F   | 9               | ND        | ND           | 116.5        | MMF, steroids                       |
| F907    | F   | 12              | 2.4       | ND           | 1.6          | MTX, steroids                       |
| F917    | F   | 15              | ND        | ND           | 202.8        | HCO, MTX, steroids                  |
| F918    | M   | 14              | 8.5       | ND           | 26.7         | Steroids                            |
| F938    | F   | 13              | 9.2       | ND           | 94.1         | MMF, steroids                       |
| F940    | F   | 6               | 46.7      | ND           | 364.5        | MTX                                 |
| F942    | F   | 11              | ND        | ND           | 17.6         | MMF                                 |
| F945    | M   | 10              | 4.6       | ND           | 153.4        | HCO, i.v. Ig, RTX, steroids         |
| F946    | F   | 8               | 2.7       | ND           | 19.1         | HCO, i.v. Ig, steroids              |
| F947    | F   | 15              | 16.1      | <3           | 3.7          | Bolus MP, steroids                  |
| F948    | M   | 16              | 37.1      | 100          | 20,149.5     | HCO, MMF                            |
| F976    | M   | 14              | 0.4       | ND           | 0.7          | Steroids                            |
| F1011   | F   | 12              | 17.7      | ND           | 106.7        | Aspirin, HCO, MMF, steroids         |
| F1022   | F   | 14              | 18.6      | 50           | 939.4        | —                                   |
| F1051   | F   | 13              | 17.8      | <3           | 14.3         | MTX, steroids                       |
| F1066   | M   | 18              | ND        | ND           | 2,274.0      | —                                   |
| F1067   | F   | 11              | 4.1       | ND           | 33.1         | —                                   |
| F1073   | F   | 13              | 10.2      | ND           | 92.7         | Plasmapheresis                      |
| F1091   | M   | 15              | 12.0      | ND           | 82.2         | MTX                                 |
| F1093   | M   | 11              | 29.8      | ND           | 212.6        | MTX, steroids                       |
| F1105   | F   | 14              | 31.9      | 12           | 33.0         | Bolus MP, MTX, steroids             |
| F1106   | F   | 12              | 18.3      | ND           | 7,457.6      | —                                   |
| F1162   | F   | 17              | 9.0       | ND           | 24.2         | HCO, MMF, MTX, steroids             |
| F1175   | F   | 14              | 43.1      | ND           | 119.8        | Steroids                            |
| F1177   | F   | 13              | ND        | ND           | 95.7         | MTX, steroids                       |
| F1178   | F   | 15              | ND        | ND           | 69.4         | MTX, steroids                       |
| F1193   | M   | 9               | 8.5       | ND           | 50.0         | HCO, MTX, steroids                  |
| F1194   | F   | 13              | ND        | ND           | 10.5         | AZA, 5-ASA                          |
| F1209   | F   | 9               | ND        | ND           | 75.7         | Steroids                            |
| F1245   | M   | 18              | ND        | ND           | 55.9         | HCO, MTX                            |
| F1305   | F   | 9               | ND        | ND           | 14.0         | —                                   |
| F1320   | M   | 12              | ND        | ND           | 56.1         | Steroids                            |
| F1326   | F   | 16              | ND        | ND           | 0.3          | HCO, MTX, steroids                  |
| F1124   | F   | 15              | ND        | ND           | 1.3          | —                                   |
| F1435   | M   | 10              | ND        | ND           | 16.5         | —                                   |
| F1511   | F   | 19              | 22.0      | ND           | 116.6        | —                                   |
| F1527   | F   | 16              | ND        | ND           | 68.4         | —                                   |
| F1540   | F   | 13              | ND        | ND           | 7.9          | Steroids                            |

5-ASA, 5-aminosalicylic acid; AZA, azathioprine; F, female; HCO, hydroxychloroquine; M, male; MMF, mycophenolate mofetil; MP, methylprednisolone; MTX, methotrexate; ND, not determined; RTX, rituximab.

Table S3. SLE

| Patient | Phenotype | Sex | Age at sampling | ISG score | IFN activity | IFN $\alpha$ |
|---------|-----------|-----|-----------------|-----------|--------------|--------------|
|         |           |     | yr              |           |              | fg/ml        |
| LUP001  | SLE       | F   | 41              | ND        | ND           | 0.69         |
| LUP002  | SLE       | F   | 61              | ND        | ND           | 189.73       |
| LUP003  | SLE       | F   | 53              | ND        | ND           | 67.08        |
| LUP004  | SLE       | F   | 55              | ND        | ND           | 1,029.55     |
| LUP005  | SLE       | F   | 59              | ND        | ND           | 23.59        |
| LUP006  | SLE       | F   | 40              | ND        | ND           | 815.33       |
| LUP007  | SLE       | F   | 47              | ND        | ND           | 0.69         |
| LUP008  | SLE       | F   | 75              | ND        | ND           | 9.53         |
| LUP009  | SLE       | F   | 20              | ND        | ND           | 80.55        |
| LUP010  | SLE       | F   | 67              | ND        | ND           | 0.69         |
| LUP011  | SLE       | F   | 57              | ND        | ND           | 0.69         |
| LUP012  | SLE       | F   | 43              | ND        | ND           | 343.41       |
| LUP013  | SLE       | F   | 67              | ND        | ND           | 0.69         |
| LUP014  | SLE       | F   | 51              | ND        | ND           | 748.31       |
| LUP015  | SLE       | F   | 23              | ND        | ND           | 5.37         |
| LUP016  | SLE       | F   | 67              | ND        | ND           | 2.39         |
| LUP017  | SLE       | F   | 34              | ND        | ND           | 4.31         |
| LUP018  | SLE       | F   | 30              | ND        | ND           | 146.68       |
| LUP020  | SLE       | F   | 54              | ND        | ND           | 7.18         |
| LUP021  | SLE       | F   | 70              | ND        | ND           | 18.86        |
| LUP022  | SLE       | F   | 28              | 28.6      | ND           | 190.44       |
| LUP023  | SLE       | F   | 50              | 0.47      | ND           | 0.69         |
| LUP024  | SLE       | F   | 47              | 0.74      | ND           | 0.69         |
| LUP025  | SLE       | F   | 63              | 27.32     | ND           | 1,969.67     |
| LUP026  | SLE       | F   | 67              | 16.05     | ND           | 50.96        |
| LUP027  | SLE       | F   | 42              | 22.84     | ND           | 1,204.64     |
| LUP028  | SLE       | F   | 43              | 12.23     | ND           | 31.69        |
| LUP029  | SLE       | F   | 40              | 25.11     | ND           | 0.69         |
| LUP030  | SLE       | F   | 67              | 1.92      | ND           | 0.69         |
| LUP032  | SLE       | M   | 60              | 16.7      | ND           | 217.50       |
| LUP034  | SLE       | F   | 38              | 24.05     | ND           | 580.45       |
| LUP035  | SLE       | F   | 41              | 1.11      | ND           | 0.69         |
| LUP036  | SLE       | M   | 32              | 0.31      | ND           | 0.69         |
| LUP037  | SLE       | F   | 41              | 0.75      | ND           | 0.69         |
| LUP039  | SLE       | F   | 48              | 0.18      | ND           | 0.69         |
| LUP040  | SLE       | F   | 50              | 12.39     | ND           | 49.02        |
| LUP041  | SLE       | F   | ND              | ND        | ND           | 0.69         |
| LUP042  | SLE       | F   | 45              | 6.64      | ND           | 9.28         |
| LUP043  | SLE       | F   | 66              | 6.81      | ND           | 15.91        |
| LUP044  | SLE       | F   | 24              | 0.21      | ND           | 0.69         |
| LUP045  | SLE       | F   | 54              | 0.17      | ND           | 0.69         |
| LUP046  | SLE       | F   | 52              | 0.27      | ND           | 83.73        |
| LUP047  | SLE       | F   | 30              | ND        | ND           | 9.39         |
| LUP048  | SLE       | F   | 57              | 17.9      | ND           | 113.59       |
| LUP049  | SLE       | F   | 22              | 19.23     | ND           | 694.19       |
| LUP050  | SLE       | F   | 40              | 0.26      | ND           | 0.69         |
| LUP051  | SLE       | M   | 44              | 5.01      | ND           | 6.02         |
| CTD002  | SLE       | F   | 44              | ND        | ND           | 501.50       |
| CTD009  | SLE       | F   | 30              | ND        | ND           | 292.40       |
| CTD014  | SLE       | F   | 40              | ND        | ND           | 111.11       |
| CTD017  | SLE       | F   | 35              | ND        | ND           | 267.97       |
| CTD021  | SLE       | F   | 29              | ND        | ND           | 1,657.47     |
| CTD025  | SLE       | F   | 62              | ND        | ND           | 3.10         |
| CTD026  | SLE       | F   | 49              | ND        | ND           | 328.93       |
| CTD031  | SLE       | F   | 32              | ND        | ND           | 0.69         |
| CTD033  | SLE       | F   | 58              | ND        | ND           | 236.83       |
| CTD060  | SLE       | F   | 23              | ND        | ND           | 0.69         |
| CTD061  | SLE       | M   | 17              | ND        | ND           | 67.62        |
| CTD064  | SLE       | F   | 62              | ND        | ND           | 12.11        |
| CTD066  | SLE       | F   | 51              | ND        | ND           | 75.15        |
| CTD067  | SLE       | F   | 52              | ND        | ND           | 0.69         |
| CTD073  | SLE       | F   | 47              | ND        | ND           | 13.23        |

Table S3. SLE (Continued)

| Patient | Phenotype | Sex | Age at sampling | ISG score | IFN activity | IFN $\alpha$ |
|---------|-----------|-----|-----------------|-----------|--------------|--------------|
| CTD074  | SLE       | F   | 45              | ND        | ND           | 0.69         |
| CTD075  | SLE       | F   | 30              | ND        | ND           | 1,035.89     |
| CTD096  | SLE       | F   | 51              | ND        | ND           | 2,044.52     |
| CTD099  | SLE       | F   | 55              | ND        | ND           | 0.69         |
| F1017   | JSLE      | M   | 15              | 1.9       | ND           | 11.62        |
| F1054   | JSLE      | F   | 11              | 24        | ND           | 986.27       |
| F1078   | JSLE      | F   | 15              | 11.4      | ND           | 112.26       |
| F898    | JSLE      | F   | 12              | 11.3      | ND           | 226.53       |
| F472    | JSLE      | F   | 15              | 25.9      | 100          | 4,379.37     |
| F885    | JSLE      | F   | 15              | 5.4       | 2            | 21.40        |

F, female; M, male; ND, not determined.

Table S4. Monogenic interferonopathies

| Patient | Phenotype                              | Sex | Age at sampling | Gene            | ISG score | IFN activity | IFN $\alpha$          |
|---------|----------------------------------------|-----|-----------------|-----------------|-----------|--------------|-----------------------|
|         |                                        |     | yr              |                 |           |              | fg/ml                 |
| F759    | AGS                                    | F   | 5               | <i>ADAR1</i>    | 18.6      | ND           | 111.20                |
| F788    | AGS                                    | F   | 3               | <i>ADAR1</i>    | 4.6       | ND           | 36.55                 |
| F755_1  | AGS-like (proband)                     | M   | 3               | <i>IFIH1</i>    | 31.9      | ND           | 218.51                |
| F755_2  | FCL-like (sibling of proband)          | M   | 4               | <i>IFIH1</i>    | 59.8      | 300          | 10,188.83             |
| F755_3  | SMS-like (father of F755_1 and F755_2) | M   | 42              | <i>IFIH1</i>    | 16.7      | <2           | 38.74                 |
| F427    | AGS                                    | M   | 6               | <i>RNASEH2A</i> | 9.7       | ND           | 71.35                 |
| F127    | AGS                                    | M   | 9               | <i>RNASEH2B</i> | 5.2       | ND           | 30.42                 |
| F190    | AGS                                    | F   | 10              | <i>RNASEH2B</i> | 5.4       | ND           | 59.18                 |
| F711    | AGS                                    | F   | 4               | <i>RNASEH2B</i> | 1.3       | ND           | 5.32                  |
| F903    | AGS                                    | F   | 4               | <i>RNASEH2B</i> | 7.4       | ND           | 248.65                |
| F1023   | AGS                                    | F   | 1               | <i>RNASEH2B</i> | 6.0       | ND           | 2,223.52              |
| F1169   | AGS                                    | M   | 2               | <i>RNASEH2B</i> | 7.0       | ND           | 306.36                |
| F088_1  | AGS (sibling of F088_2)                | M   | 11              | <i>RNASEH2C</i> | 8.6       | ND           | 310.38                |
| F088_2  | AGS (sibling of F088_1)                | M   | 16              | <i>RNASEH2C</i> | 9.8       | ND           | 506.15                |
| F559    | AGS                                    | M   | 11              | <i>SAMHD1</i>   | 16.2      | 75           | 7,699.83              |
| F1119   | AGS                                    | F   | 3               | <i>SAMHD1</i>   | 17.4      | 4            | 92.00                 |
| F1289   | AGS                                    | M   | 2               | <i>SAMHD1</i>   | ND        | ND           | 14,236.0 <sup>a</sup> |
| F769    | AGS                                    | M   | 14              | <i>TREX1</i>    | 16.8      | ND           | 3,379.48              |
| F958    | AGS                                    | F   | 1               | <i>TREX1</i>    | 3.6       | ND           | 1,221.43              |
| F1081_1 | FCL (proband)                          | F   | 28              | <i>TREX1</i>    | 6.2       | ND           | 175.44                |
| F1081_2 | Asymptomatic mother of F1081_1         | F   | 49              | <i>TREX1</i>    | 7.7       | ND           | 56.38                 |
| F831    | STING                                  | F   | 5               | <i>TMEM173</i>  | ND        | 9            | 1,627.99              |
| F876    | STING                                  | M   | 9               | <i>TMEM173</i>  | 24.9      | ND           | 14,735.41             |
| F1058   | STING                                  | F   | 8               | <i>TMEM173</i>  | 13.9      | ND           | 817.80                |
| F1182   | STING                                  | M   | 11              | <i>TMEM173</i>  | 24.5      | ND           | 942.90                |
| F1295   | STING                                  | M   | 9               | <i>TMEM173</i>  | ND        | ND           | 2,416.50              |
| F1429   | STING                                  | M   | 8               | <i>TMEM173</i>  | 21.1      | ND           | 896.30                |
| F1802   | STING                                  | M   | 16              | <i>TMEM173</i>  | ND        | ND           | 44,579.70             |

F, female; FCL, familial chilblain lupus; SAVI, STING-associated vasculopathy with onset in infancy; SMS, Singleton–Merten syndrome; M, male; ND, not determined.

<sup>a</sup>Measured in CSF.

Table S5. **CNS inflammation**

| Patient | Sex | Age at sampling<br><i>yr</i> | Phenotype                              | IFN $\alpha$ activity CSF | IFN $\alpha$ CSF<br><i>fg/ml</i> |
|---------|-----|------------------------------|----------------------------------------|---------------------------|----------------------------------|
| 152-86  | F   | <1                           | Enteroviral meningitis                 | 25                        | 14,371.2                         |
| 153-19  | M   | <1                           | Enteroviral meningitis                 | 18                        | 3,786.4                          |
| 166-84  | M   | <1                           | Enteroviral meningitis                 | 38                        | 6,432.2                          |
| 165-86  | F   | <1                           | Enteroviral meningitis                 | 38                        | 11,173.4                         |
| 157-23  | M   | <1                           | Enteroviral meningitis                 | 25                        | 4,817.7                          |
| 163-12  | F   | 59                           | Herpes zoster meningitis               | <2                        | 84.8                             |
| 160-92  | F   | 26                           | Herpes zoster meningitis               | 18                        | 2,870.7                          |
| 165-77  | M   | <1                           | Varicella meningitis                   | 3                         | 3,385.7                          |
| 152-100 | M   | 5                            | Viral meningitis <sup>a</sup>          | 18                        | 5,666.8                          |
| 165-81  | F   | 46                           | Herpes simplex encephalitis            | 9                         | 2,737.6                          |
| 154-78  | F   | 36                           | Herpes simplex encephalitis            | 75                        | 27,615.3                         |
| 163-52  | F   | 90                           | Herpes zoster encephalitis             | 3                         | 1,000.9                          |
| 160-47  | M   | 76                           | Herpes zoster encephalitis             | 6                         | 2,437.4                          |
| 165-46  | M   | 39                           | Viral encephalitis <sup>a</sup>        | 2                         | 408.6                            |
| 159-3   | M   | <1                           | Viral meningoencephalitis <sup>a</sup> | >200                      | 33,035.6                         |
| 159-75  | M   | <1                           | Post-infectious encephalitis           | 9                         | 8,581.6                          |
| 162-12  | M   | 2                            | Post-infectious encephalitis           | 6                         | 1,711.1                          |
| 165-42  | M   | <1                           | Post-infectious encephalitis           | 6                         | 4,174.2                          |
| 158-39  | M   | 14                           | Post-infectious encephalomyelitis      | 12                        | 2,0314.3                         |

F, female; M, male.

<sup>a</sup>Diagnosis of probable viral meningitis or encephalitis was established on clinical, biological, and imaging data.Table S6. **Healthy controls**

| Individual | IFN $\alpha$<br><i>fg/ml</i> |
|------------|------------------------------|
| 816-19     | 0.69                         |
| 816-16     | 0.69                         |
| 816-12     | 0.69                         |
| 816-08     | 0.69                         |
| 816-07     | 0.69                         |
| 816-06     | 0.69                         |
| 816-05     | 2.01                         |
| 816-01     | 0.82                         |
| 816-50     | 0.69                         |
| 816-47     | 0.69                         |
| 816-33     | 0.69                         |
| 816-32     | 0.69                         |
| 816-24     | 0.69                         |
| 816-22     | 0.69                         |
| 816-21     | 13.13                        |
| 816-20     | 0.69                         |
| 816-89     | 0.69                         |
| 816-83     | 0.69                         |
| 816-79     | 1.18                         |
| 816-52     | 5.99                         |

Table S7. Information on data used for Fig. 3 A

| Patients | Phenotypes   | Gene            | IFN $\alpha$ | IFN activity |
|----------|--------------|-----------------|--------------|--------------|
|          |              |                 | <i>fg/ml</i> |              |
| F788     | AGS          | <i>ADAR1</i>    | 36.5         | 3            |
| F755_3   | SMS-like     | <i>IFIH1</i>    | 38.7         | <2           |
| F755_2   | FCL-like     | <i>IFIH1</i>    | 10,188.8     | 300          |
| AGS1169  | AGS          | <i>RNASEH2B</i> | 379.6        | 3            |
| AGS1023  | AGS          | <i>RNASEH2B</i> | 2,527.5      | 12           |
| F559     | AGS          | <i>SAMHD1</i>   | 7,699.8      | 75           |
| F1081_1  | FLC          | <i>TREX1</i>    | 175.4        | <2           |
| F1081_2  | Asymptomatic | <i>TREX1</i>    | 56.4         | <2           |
| F831     | SAVI         | <i>TMEM173</i>  | 722.8        | 9            |
| F876     | SAVI         | <i>TMEM173</i>  | 14,735.4     | 200          |
| AGS1429  | SAVI         | <i>TMEM173</i>  | 896.3        | 12           |
| F1022    | JDM          |                 | 939.4        | 50           |
| F1051    | JDM          |                 | 14.3         | <3           |
| F1066    | JDM          |                 | 2,274.2      | 25           |
| F1073    | JDM          |                 | 54.1         | 2            |
| F1093    | JDM          |                 | 9,100.7      | 50           |
| F1105    | JDM          |                 | 33.0         | 12           |
| F1105    | JDM          |                 | 13.7         | <2           |
| F1106    | JDM          |                 | 6,650.3      | 75           |
| F1175    | JDM          |                 | 238.1        | 2            |
| F1175    | JDM          |                 | 119.8        | 12           |
| F1193    | JDM          |                 | 48.3         | <2           |
| F857     | JDM          |                 | 196.9        | 12           |
| F857     | JDM          |                 | 185.2        | 2            |
| F857     | JDM          |                 | 204.6        | 2            |
| F907     | JDM          |                 | 52.5         | <2           |
| F945     | JDM          |                 | 68.7         | <2           |
| F945     | JDM          |                 | 44.9         | <2           |
| F945     | JDM          |                 | 169.5        | 2            |
| F945     | JDM          |                 | 146.0        | <2           |
| F945     | JDM          |                 | 313.5        | 2            |
| F946     | JDM          |                 | 6.8          | 2            |
| F947     | JDM          |                 | 3.7          | <3           |
| F948     | JDM          |                 | 20,149.5     | 100          |
| F948     | JDM          |                 | 6,012.5      | 50           |
| F970     | JDM          |                 | 1.1          | <2           |
| F885     | JSLE         |                 | 21.4         | 2            |
| F472     | JSLE         |                 | 4,379.4      | 100          |

FCL, familial chilblain lupus; SAVI, STING-associated vasculopathy with onset in infancy; SMS, Singleton–Merten syndrome.



Table S8. Information on data used for Fig. 3 (C-E)

| Patients | Phenotypes   | Gene            | IFN $\alpha$ | ISG score |
|----------|--------------|-----------------|--------------|-----------|
|          |              |                 | <i>fg/ml</i> |           |
| F759     | AGS          | <i>ADAR1</i>    | 111.2        | 18.6      |
| F788     | AGS          | <i>ADAR1</i>    | 36.5         | 4.6       |
| F755_1   | AGS-like     | <i>IFIH1</i>    | 218.5        | 31.9      |
| F755_2   | FCL-like     | <i>IFIH1</i>    | 10,188.8     | 59.8      |
| F755_3   | SMS-like     | <i>IFIH1</i>    | 38.7         | 16.7      |
| F427     | AGS          | <i>RNASEH2A</i> | 71.4         | 9.7       |
| F427     | AGS          | <i>RNASEH2A</i> | 47.7         | 6.5       |
| F1023    | AGS          | <i>RNASEH2B</i> | 2,223.5      | 6.0       |
| F1169    | AGS          | <i>RNASEH2B</i> | 306.4        | 7.0       |
| F127     | AGS          | <i>RNASEH2B</i> | 30.4         | 5.2       |
| F903     | AGS          | <i>RNASEH2B</i> | 248.6        | 7.4       |
| F190     | AGS          | <i>RNASEH2B</i> | 59.2         | 5.4       |
| F711     | AGS          | <i>RNASEH2B</i> | 5.3          | 1.3       |
| F088_1   | AGS          | <i>RNASEH2C</i> | 310.4        | 8.6       |
| F088_2   | AGS          | <i>RNASEH2C</i> | 506.1        | 9.8       |
| F559     | AGS          | <i>SAMHD1</i>   | 7,699.8      | 16.2      |
| F1119    | AGS          | <i>SAMHD1</i>   | 92.0         | 17.4      |
| F1081_1  | FLC          | <i>TREX1</i>    | 175.4        | 6.2       |
| F1081_2  | Asymptomatic | <i>TREX1</i>    | 56.4         | 7.7       |
| F769     | AGS          | <i>TREX1</i>    | 3,379.5      | 16.8      |
| F958     | AGS          | <i>TREX1</i>    | 1,221.4      | 3.6       |
| F831     | SAVI         | <i>TMEM173</i>  | 1,657.0      | 63.7      |
| F831     | SAVI         | <i>TMEM173</i>  | 1,989.1      | 36.3      |
| F831     | SAVI         | <i>TMEM173</i>  | 3,847.1      | 37.5      |
| F831     | SAVI         | <i>TMEM173</i>  | 1,395.2      | 33.7      |
| F831     | SAVI         | <i>TMEM173</i>  | 3,316.7      | 37.6      |
| F831     | SAVI         | <i>TMEM173</i>  | 3,134.1      | 21.4      |
| F1182    | SAVI         | <i>TMEM173</i>  | 942.9        | 24.5      |
| F876     | SAVI         | <i>TMEM173</i>  | 14,735.4     | 24.9      |
| F948     | DMJ          |                 | 20,149.5     | 37.1      |
| F1105    | DMJ          |                 | 33.0         | 31.9      |
| F1193    | DMJ          |                 | 50.0         | 8.5       |
| F1106    | DMJ          |                 | 7,457.6      | 18.3      |
| F745     | DMJ          |                 | 48.5         | 8.1       |
| F1162    | DMJ          |                 | 24.2         | 9.0       |
| F857     | DMJ          |                 | 196.9        | 25.9      |
| F1022    | DMJ          |                 | 939.4        | 18.6      |
| F1051    | DMJ          |                 | 14.3         | 17.8      |
| F918     | DMJ          |                 | 26.7         | 8.5       |
| F976     | DMJ          |                 | 0.7          | 0.4       |
| F1175    | DMJ          |                 | 119.8        | 43.1      |
| F938     | DMJ          |                 | 94.1         | 9.2       |
| F907     | DMJ          |                 | 1.6          | 2.4       |
| F940     | DMJ          |                 | 364.5        | 46.7      |
| F1073    | DMJ          |                 | 92.7         | 10.2      |
| F1011    | DMJ          |                 | 106.7        | 17.7      |
| F1093    | DMJ          |                 | 212.6        | 29.8      |
| F1091    | DMJ          |                 | 82.2         | 12.0      |
| F947     | DMJ          |                 | 3.7          | 16.1      |
| F1511    | DMJ          |                 | 116.6        | 22.0      |
| F1067    | DMJ          |                 | 33.1         | 4.1       |
| F946     | DMJ          |                 | 19.1         | 2.7       |
| F945     | DMJ          |                 | 153.4        | 4.6       |
| F1017    | JSLE         |                 | 11.6         | 1.9       |
| F1054    | JSLE         |                 | 986.3        | 24.0      |
| F1078    | JSLE         |                 | 112.3        | 11.4      |
| F898     | JSLE         |                 | 226.5        | 11.3      |
| F472     | JSLE         |                 | 4,379.4      | 25.9      |
| F885     | JSLE         |                 | 21.4         | 5.4       |
| LUP022-1 | SLE          |                 | 190.4        | 28.6      |
| LUP023-1 | SLE          |                 | 0.7          | 0.5       |
| LUP024-1 | SLE          |                 | 0.7          | 0.7       |

Table S8. Information on data used for Fig. 3 (C–E) (Continued)

| Patients | Phenotypes | Gene | IFN $\alpha$ | ISG score |
|----------|------------|------|--------------|-----------|
| LUP025-1 | SLE        |      | 1,969.7      | 27.3      |
| LUP026-1 | SLE        |      | 51.0         | 16.1      |
| LUP027-1 | SLE        |      | 1,204.6      | 22.8      |
| LUP028-1 | SLE        |      | 31.7         | 12.2      |
| LUP029-1 | SLE        |      | 0.7          | 25.1      |
| LUP030-1 | SLE        |      | 0.7          | 1.9       |
| LUP032-1 | SLE        |      | 217.5        | 16.7      |
| LUP034-1 | SLE        |      | 580.5        | 24.1      |
| LUP035-1 | SLE        |      | 0.7          | 1.1       |
| LUP036-2 | SLE        |      | 0.7          | 0.3       |
| LUP037-1 | SLE        |      | 0.7          | 0.8       |
| LUP039-2 | SLE        |      | 0.7          | 0.2       |
| LUP040-1 | SLE        |      | 49.0         | 12.4      |
| LUP042-1 | SLE        |      | 9.3          | 6.6       |
| LUP043-1 | SLE        |      | 15.9         | 6.8       |
| LUP044-1 | SLE        |      | 0.7          | 0.2       |
| LUP045-1 | SLE        |      | 0.7          | 0.2       |
| LUP046-1 | SLE        |      | 83.7         | 0.3       |
| LUP048-1 | SLE        |      | 113.6        | 17.9      |
| LUP049-1 | SLE        |      | 694.2        | 19.2      |
| LUP050-1 | SLE        |      | 0.7          | 0.3       |
| LUP051-1 | SLE        |      | 6.0          | 5.0       |

FCL, familial chilblain lupus; SAVI, STING-associated vasculopathy with onset in infancy; SMS, Singleton–Merten syndrome.

Table S9. Demographic and clinical associations of raised serum IFN $\alpha$  levels in SLE patients

| Parameter               | Serum IFN concentration |                         |                      | P-value |
|-------------------------|-------------------------|-------------------------|----------------------|---------|
|                         | Low ( <i>n</i> = 27)    | Medium ( <i>n</i> = 14) | High ( <i>n</i> = 8) |         |
| Age (yr)                | 47 $\pm$ 2.8            | 51 $\pm$ 4.2            | 44 $\pm$ 4.3         | 0.47    |
| Sex                     | Female 25, male 2       | Female 13, male 1       | Female 8, male 0     |         |
| CRP                     | 7.8 $\pm$ 2.3           | 2.7 $\pm$ 0.6           | 5.9 $\pm$ 2.4        | 0.20    |
| Anti-dsDNA titer (U/ml) | 32.6 $\pm$ 7.4          | 28.9 $\pm$ 8.5          | 47.7 $\pm$ 24.9      | 0.58    |
| Number of IM drugs      | 1.6                     | 1.6                     | 1.9                  | 0.76    |

Mean values  $\pm$  SEM are shown with results of one-way ANOVA. dsDNA, double-stranded DNA; IM, immunomodulatory (includes prednisolone, hydroxychloroquine, methotrexate, rituximab, mycophenolate mofetil, and azathioprine).

Table S10. Circulating leukocyte frequencies in STING, AGS, JDM, and controls

| Cell subset | Control ( <i>n</i> = 4) | DMJ ( <i>n</i> = 3) | AGS ( <i>n</i> = 4) | STING ( <i>n</i> = 3) | LUPUS ( <i>n</i> = 3) |
|-------------|-------------------------|---------------------|---------------------|-----------------------|-----------------------|
| CD4         | 12.9 $\pm$ 8.8          | 9.0 $\pm$ 2.9       | 24.0 $\pm$ 22.3     | 17.0 $\pm$ 4.9        | 34.5 $\pm$ 8.1        |
| CD8         | 34.6 $\pm$ 17.4         | 9.3 $\pm$ 3.4       | 8.9 $\pm$ 4.8       | 15.8 $\pm$ 5.0        | 24.5 $\pm$ 11.2       |
| B cells     | 7.4 $\pm$ 3.1           | 7.8 $\pm$ 9.1       | 21.4 $\pm$ 21.3     | 8.6 $\pm$ 5.4         | 7.5 $\pm$ 4.4         |
| NK cells    | 14.9 $\pm$ 4.4          | 12.0 $\pm$ 9.0      | 4.9 $\pm$ 4.4       | 3.9 $\pm$ 4.4         | 18.1 $\pm$ 14.5       |
| Mo          | 33.2 $\pm$ 13.2         | 48.7 $\pm$ 17.9     | 17.5 $\pm$ 14.6     | 3.4 $\pm$ 1.7         | 4.2 $\pm$ 5.5         |
| pDCs        | 0.7 $\pm$ 0.5           | 1.4 $\pm$ 0.7       | 0.9 $\pm$ 1.1       | 0.3 $\pm$ 0.2         | 0.1 $\pm$ 0.0         |

Values are reported as mean  $\pm$  SD. Mo, monocytes.

Table S11. Sorted cell numbers and IFN concentration

| Diseases and patients | Subsets | Cells (50 µl lysate) | fg/ml    | attograms/cell |
|-----------------------|---------|----------------------|----------|----------------|
| <b>JDM</b>            |         |                      |          |                |
| F1073                 | T4      | 30,000               | 4.16     | 0.0069         |
|                       | T8      | 24,000               | 2.20     | 0.0046         |
|                       | NK      | 20,000               | 1.68     | 0.0042         |
|                       | B       | NA                   | NA       | NA             |
|                       | Mo      | 30,000               | <LOD     | ND             |
|                       | pDC     | 11,000               | <LOD     | ND             |
| F948                  | T4      | 60,000               | 8.88     | 0.0074         |
|                       | T8      | 90,500               | 17.02    | 0.0094         |
|                       | NK      | 60,000               | 3.53     | 0.0029         |
|                       | B       | 90,000               | 7.05     | 0.0039         |
|                       | Mo      | 79,000               | <LOD     | ND             |
|                       | pDC     | 4,000                | 3.67     | 0.0458         |
| F857                  | T4      | 52,000               | 10.87    | 0.0104         |
|                       | T8      | 45,000               | 20.83    | 0.0231         |
|                       | NK      | 23,000               | 5.41     | 0.0118         |
|                       | B       | 23,000               | 5.85     | 0.0127         |
|                       | Mo      | 100,000              | 2.38     | 0.0012         |
|                       | pDC     | 3,000                | <LOD     | ND             |
| <b>AGS</b>            |         |                      |          |                |
| F1119                 | T4      | 30,000               | 3.14     | 0.0052         |
|                       | T8      | 16,500               | <LOD     | ND             |
|                       | NK      | 4,000                | <LOD     | ND             |
|                       | B       | 6,000                | <LOD     | ND             |
|                       | Mo      | 30,000               | <LOD     | ND             |
|                       | pDC     | 3,800                | <LOD     | ND             |
| F1023                 | T4      | 60,000               | 21.81    | 0.0182         |
|                       | T8      | 34,000               | 28.58    | 0.0420         |
|                       | NK      | 5,000                | 2.37     | 0.0237         |
|                       | B       | 60,000               | 19.12    | 0.0159         |
|                       | Mo      | 66,000               | 4.66     | 0.0035         |
|                       | pDC     | 1,700                | <LOD     | ND             |
| F88-1                 | T4      | 60,000               | 27.70    | 0.0231         |
|                       | T8      | 100,000              | 32.48    | 0.0162         |
|                       | NK      | 210,000              | 66.61    | 0.0159         |
|                       | B       | 85,000               | 10.94    | 0.0064         |
|                       | Mo      | 250,000              | 15.85    | 0.0032         |
|                       | pDC     | 9,000                | <LOD     | ND             |
| F559                  | T4      | 300,000              | 43.90    | 0.0073         |
|                       | T8      | 200,000              | 56.40    | 0.0141         |
|                       | NK      | 210,000              | 49.08    | 0.0117         |
|                       | B       | 170,000              | 25.51    | 0.0075         |
|                       | Mo      | 370,000              | 16.60    | 0.0022         |
|                       | pDC     | 5,300                | <LOD     | ND             |
| <b>SAVI</b>           |         |                      |          |                |
| F876                  | T4      | 20,000               | 8.82     | 0.0220         |
|                       | T8      | 5,000                | 11.65    | 0.1165         |
|                       | NK      | 20,000               | 15.09    | 0.0377         |
|                       | B       | 10,200               | 2.56     | 0.0126         |
|                       | Mo      | 25,000               | 1,126.72 | 2.2534         |
|                       | pDC     | 35,000               | 1,856.51 | 2.6522         |
| F1429                 | T4      | 100,000              | 15.20    | 0.0076         |
|                       | T8      | 100,000              | 26.36    | 0.0132         |
|                       | NK      | 30,000               | 13.50    | 0.0225         |
|                       | B       | 30,000               | 5.31     | 0.0088         |
|                       | Mo      | 90,000               | 1,337.37 | 0.7430         |
|                       | pDC     | 6,000                | 219.22   | 1.8268         |
| F1802                 | T4      | 100,000              | 18.15    | 0.0091         |
|                       | T8      | 93,000               | 13.43    | 0.0072         |
|                       | NK      | 100,000              | 9.70     | 0.0049         |
|                       | B       | 100,000              | 19.18    | 0.0096         |
|                       | Mo      | 100,000              | 198.49   | 0.0992         |
|                       | pDC     | 16,000               | 36.75    | 0.1148         |

Table S11. Sorted cell numbers and IFN concentration (Continued)

| Diseases and patients | Subsets | Cells (50 µl lysate) | fg/ml | attograms/cell |
|-----------------------|---------|----------------------|-------|----------------|
| <b>SLE</b>            |         |                      |       |                |
| LU3                   | T4      | 100,000              | 22.74 | 0.0114         |
|                       | T8      | 100,000              | 2.61  | 0.0013         |
|                       | NK      | 100,000              | 5.61  | 0.0028         |
|                       | B       | 111,833              | 43.81 | 0.0196         |
|                       | Mo      | 3,452                | <LOD  | ND             |
|                       | pDC     | 1,317                | <LOD  | ND             |
| LU4                   | T4      | 100,000              | 7.35  | 0.0037         |
|                       | T8      | 46,839               | 7.08  | 0.0076         |
|                       | NK      | 56,442               | 26.51 | 0.0235         |
|                       | B       | 4,746                | <LOD  | ND             |
|                       | Mo      | 33,909               | 1.17  | 0.0017         |
|                       | pDC     | 588                  | <LOD  | ND             |
| LU6                   | T4      | 100,000              | 76.47 | 0.0382         |
|                       | T8      | 100,000              | <LOD  | 0.0010         |
|                       | NK      | 100,000              | 2.38  | 0.0012         |
|                       | B       | 100,000              | 8.36  | 0.0042         |
|                       | Mo      | 21,020               | <LOD  | ND             |
|                       | mDC     | 1,614                | <LOD  | ND             |
| <b>Controls</b>       |         |                      |       |                |
| CT1                   | T4      | 100,000              | 15.62 | 0.0078         |
|                       | T8      | 50,000               | 14.08 | 0.0141         |
|                       | NK      | 50,000               | 3.26  | 0.0033         |
|                       | B       | 50,000               | 11.53 | 0.0115         |
|                       | Mo      | 510,000              | 5.74  | 0.0006         |
|                       | pDC     | 9,000                | 4.01  | 0.0223         |
| CT2                   | T4      | 100,000              | 24.06 | 0.0120         |
|                       | T8      | 100,500              | 28.80 | 0.0143         |
|                       | NK      | 100,000              | 23.49 | 0.0117         |
|                       | B       | 100,000              | 29.28 | 0.0146         |
|                       | Mo      | 100,000              | 1.47  | 0.0007         |
|                       | pDC     | 16,000               | 15.54 | 0.0486         |
| CT3                   | T4      | 100,000              | 24.84 | 0.0124         |
|                       | T8      | 59,500               | 17.44 | 0.0147         |
|                       | NK      | 66,500               | 5.13  | 0.0039         |
|                       | B       | 51,000               | 37.89 | 0.0371         |
|                       | Mo      | 54,000               | 5.53  | 0.0051         |
|                       | pDC     | 15,000               | 4.39  | 0.0146         |

B, B cell; Mo, monocyte; mDC, myeloid DC.

Table S12. Clinical information of patients studied for cell subset IFNα content

| Patient | Phenotype | Disease activity                                    | Treatment           | Clinical response to treatment | IFNα serum   |
|---------|-----------|-----------------------------------------------------|---------------------|--------------------------------|--------------|
| F857    | JDM       | High                                                | Steroids/HCO        | Poor                           | fg/ml<br>198 |
| F948    | JDM       | High                                                | MMF/HCO             | Poor                           | 3,552        |
| F1073   | JDM       | High                                                |                     | Poor                           | 32           |
| F876    | SAVI      | Low                                                 | Ruxolitinib         | Good                           | 43,031       |
| F1429   | SAVI      | Moderate                                            | Ruxolitinib         | Good                           | 896          |
| F1802   | SAVI      | Low                                                 | Not treated         |                                | 44,579       |
| F1023   | AGS       | Severe developmental delay                          | Not treated         | Not relevant                   | 581          |
| F1119   | AGS       | Moderate developmental delay with active chilblains | Not treated         | Not relevant                   | 149          |
| F559    | AGS       | Moderate developmental delay with active chilblains | Not treated         | Not relevant                   | 622          |
| F88     | AGS       | Severe developmental delay                          | Not treated         | Not relevant                   | 739          |
| LU3     | SLE       | Joint/renal involvement                             | Prednisolone        | Good                           | 241          |
| LU4     | SLE       | Joint/renal/lung involvement                        | Prednisolone/HQ/MMF | Good                           | 793          |
| LU6     | SLE       | Joint/renal involvement                             | Prednisolone/MMF    | Good                           | 131          |

HCO, hydroxychloroquine; MMF, mycophenolate mofetil; SAVI, STING-associated vasculopathy with onset in infancy.
